# 1 **Atomoxetine modulates the contribution of high- and low-level signals during** 2 **free viewing of natural images in rhesus monkeys**

3  
4 Running title: Atomoxetine adjusts attentional orienting during exploration

5  
6 Amélie J. Reynaud<sup>1,2</sup>, Elvio Blini<sup>1,2</sup>, Eric Koun<sup>1,2</sup>, Emiliano Macaluso<sup>1,2</sup>, Martine Meunier<sup>1,2</sup>,  
7 Fadila Hadj-Bouziane<sup>1,2</sup>  
8  
9

## 10 11 **Affiliations**

12 <sup>1</sup> INSERM, U1028, CNRS UMR5292, Lyon Neuroscience Research Center, ImpAct Team,  
13 Lyon, F-69000, France;

14 <sup>2</sup> University UCBL Lyon 1, F-69000, France  
15

16 **Corresponding authors:** Amélie Reynaud, [amelie.reynaud@inserm.fr](mailto:amelie.reynaud@inserm.fr) and Fadila Hadj-  
17 Bouziane, [fadila.hadj-bouziane@inserm.fr](mailto:fadila.hadj-bouziane@inserm.fr) - INSERM U1028, CNRS UMR5292, Lyon  
18 Neuroscience Research Center, ImpAct Team, 16 avenue Doyen Lépine 69500 BRON, France.

19  
20 **Keywords:** Norepinephrine, monkeys, free viewing, saliency map, priority map,  
21

## 22 **Abstract**

23 Visuo-spatial attentional orienting is fundamental to selectively process behaviorally relevant  
24 information, depending on both low-level visual attributes of stimuli in the environment and  
25 higher-level factors, such as goals, expectations and prior knowledge. Growing evidence suggests  
26 an impact of the locus-cœruleus-norepinephrine (LC-NE) system in attentional orienting that  
27 depends on task-context. Nonetheless, most of previous studies used visual displays  
28 encompassing a target and various distractors, often preceded by cues to orient the attentional  
29 focus. This emphasizes the contribution of goal-driven processes, at the expense of other factors

30 related to the stimulus content. Here, we aimed to determine the impact of NE on attentional  
31 orienting in more naturalistic conditions, using complex images and without any explicit task  
32 manipulation. We tested the effects of atomoxetine (ATX) injections, a NE reuptake inhibitor, on  
33 four monkeys during free viewing of images belonging to three categories: landscapes, monkey  
34 faces and scrambled images. Analyses of the gaze exploration patterns revealed, first, that the  
35 monkeys spent more time on each fixation under ATX compared to the control condition,  
36 regardless of the image content. Second, we found that, depending on the image content, ATX  
37 modulated the impact of low-level visual salience on attentional orienting. This effect correlated  
38 with the effect of ATX on the number and duration of fixations. Taken together, our results  
39 demonstrate that ATX adjusts the contribution of salience on attentional orienting depending on  
40 the image content, indicative of its role in balancing the role of stimulus-driven and top-down  
41 control during free viewing of complex stimuli.

42

## 43 **1. Introduction**

44 When exploring the environment, the brain receives a multitude of information of  
45 different modalities. In the visual modality, visuo-spatial attentional orienting is fundamental to  
46 selectively process information, depending on the visual attributes of the elements in the  
47 environment and our goals and needs. Growing evidence suggest an involvement of the locus-  
48 coeruleus-norepinephrine (LC-NE) system in attentional orienting (Clark et al., 1989; Coull et al.,  
49 2001; Dragone et al., 2018; Reynaud et al., 2019). Using pharmacological agents, these studies  
50 showed that increasing NE transmission improves attentional orienting when the context is  
51 predictive, i.e. when a cue accurately predicts the location of the upcoming target in the large  
52 majority (80%) of the trials (Clark et al., 1989; Coull et al., 2001; Reynaud et al., 2019). Another

53 recent study also reported larger increase of pupil diameter, often considered as a proxy of the  
54 LC-NE activity, in predictive contexts, in which the cue accurately predicted the location of the  
55 upcoming target in 80% of the trials, as compared to non-predictive contexts (50%, chance level,  
56 (Dragone et al., 2018)). Taken together, these studies are in favor of a role of NE on visuo-spatial  
57 attentional orienting that depends on the context in which the task is performed. These studies  
58 typically used spatial cueing tasks, in which the focus of attention was explicitly manipulated  
59 using spatial cues predicting the location of the upcoming target. In addition, most of these  
60 studies used simple visual displays, encompassing one target and potentially a distractor, adapted  
61 for laboratory testing. Such settings emphasize the contribution of goal-driven processes limiting  
62 the potential contribution of low-level saliency-driven processes, as well as that of other high-  
63 level signals related for example to prior knowledge about scene configuration (Henderson, 2017;  
64 Oliva and Torralba, 2007).

65         Here, we aimed to determine the impact of NE in more naturalistic conditions, without  
66 any explicit manipulation of the focus of attention to test for a potential effect of this  
67 neuromodulator on both high-level and saliency-driven attention control. We tested four monkeys  
68 during free viewing of naturalistic images under two conditions: after saline administration, used  
69 as a control condition, and after administration of atomoxetine (ATX), a NE re-uptake inhibitor  
70 that enhances the level of NE in the brain. The animals were presented with static images that  
71 they could freely explore for three seconds, while we measured their gaze position. In order to  
72 manipulate the high-level context, we presented animals with three different categories of  
73 images: intact images, i.e. landscape and monkey face images, and scrambled landscape images.  
74 The scrambled images, which remove the images meaningful information while preserving their

75 low-level visual features, were introduced to allow us to disentangle the contribution of low- and  
76 high-level features in the allocation of attention.

77 We modeled the influence of low-level signals through salience maps that integrate  
78 multiple physical characteristics of the visual images (e.g. color, luminance) (Itti et al., 1998).  
79 Previous studies have unveiled the contribution of salience maps in the spatiotemporal  
80 deployment of attention in natural scenes in humans (Berg et al., 2009; Parkhurst et al., 2002a)  
81 and monkeys (Berg et al., 2009; Berger et al., 2012). Low-level and high-level signals correspond  
82 respectively to bottom-up and top-down influences on attention control (Buschman and Miller,  
83 2007; Corbetta et al., 2008; Corbetta and Shulman, 2002). It is thought that the integration of  
84 these different types of information into priority maps guides the allocation of attention (Bisley  
85 and Mirpour, 2019; Itti and Koch, 2000). To the best of our knowledge, no study has explored the  
86 contribution of NE onto these types of influences on visuospatial attentional orienting during free  
87 viewing of naturalistic images.

88 Here, we investigated the effect of ATX on the total free exploration duration as well as  
89 the number and mean duration of fixations. To assess the degree to which the animals' gaze was  
90 influenced by salient features in the images such as color, intensity and orientation, i.e. to  
91 estimate bottom-up influences, we computed the saliency map for each image using the Graph-  
92 Based Visual Saliency model (GBVS) (Harel et al., 2006). We then compared the mean saliency  
93 of the locations the animals explored in saline versus ATX conditions. Based on the previous  
94 findings about the context-dependent role of NE on attentional orienting discussed above, we  
95 hypothesized that ATX would influence the way the animals orient their attention depending on  
96 the image content. Given the influences of the LC-NE system on sensory regions (Navarra and  
97 Waterhouse, 2019; Waterhouse and Navarra, 2019), including the visual cortex, and on frontal

98 regions controlling top-down processes (Arnsten et al., 2012; Berridge and Spencer, 2016), we  
99 further postulated that ATX could influence priority maps during free exploration, hence  
100 affecting both saliency-driven and top-down spatial orienting.

101

102

## 103 **2. Methods**

### 104 **2.1. Subjects**

105 Four female rhesus monkeys (*Macaca mulatta*) aged 5-14 years participated to this study  
106 (monkeys CA, GU, GE and CE). Animals had free access to water and were maintained on a  
107 food regulation schedule, individually optimized to maintain stable motivation across days. This  
108 study was conducted in strict accordance with Directive 2010/63/UE of the European Parliament  
109 and the Council of 22 September 2010 on the protection of animals used for scientific purposes  
110 and approved by the local Committee on the Ethics of Experiments in Animals (C2EA 42  
111 CELYNE).

112

### 113 **2.2. Experimental set-up**

114 Monkeys were seated in a primate chair in a sphinx position, with the head immobilized via a  
115 surgically implanted plastic MRI-compatible head post (CE and GE) or a non-invasive head  
116 restraint helmet (CA and GU) (Hadj-Bouziane et al., 2014), in front of a computer screen  
117 (distance: 57cm). Eye position was sampled at 120 Hz using an infrared pupil tracking system  
118 (ISCAN Raw Eye Movement Data Acquisition Software) interfaced with a program for stimulus  
119 delivery and experimental control (Presentation®).

120

### 121 **2.3. Free Viewing protocol**

122 Prior to the free viewing protocol, we used a 5-point procedure to calibrate the eye-tracker: the  
123 central point was at the center of the monitor, and the four other points were presented at 10°  
124 eccentricity on the right, left, top and bottom from the central point. During the free viewing  
125 protocol, monkeys were first required to fixate a central cross for 500ms to initiate the trial (4°  
126 window for CA and GU; 3° window for GE and CE). Then, one image was presented for 3000ms  
127 and the monkeys were free to explore it. During the inter-trial interval (800 to 1400ms), the  
128 monkeys received a reward regardless of their exploratory pattern during the previous trial.

129 Each testing session comprised the presentation of 30 images, subdivided into 3 categories: 10  
130 monkey face images (584 x 584 pixels, 10° x 10°), 10 natural landscape images (876 x 584  
131 pixels, 15° x 10°), and 10 scrambled landscape images (876 x 584 pixels, 15° x 10°). Each  
132 category comprised 5 original images and 5 horizontally flipped images, in order to control for  
133 possible biases in the lateralized distribution of objects or salient features across the images (see  
134 figure 1A for an example of images presented in one testing session). The monkey face images  
135 were the same across all sessions, whereas new landscape and scrambled images were presented  
136 at every session. Within each session, the order of the stimuli (and categories) presentation was  
137 randomized. Monkey face images were collected from the internet (criteria: rhesus macaque face  
138 with a neutral emotion) and the landscape images were drawn from the MIT places database  
139 (from 2 categories: badland and cabin outdoor) (Zhou et al., 2017, 2014). The scrambled  
140 landscape images were generated by taking the two-dimensional Fourier transform of the natural  
141 landscape images, scrambling the phase, and then taking the inverse Fourier transform. This  
142 preserves the second order statistics of the images, while interfering with higher-order statistics  
143 and - most importantly - making the image content undecipherable.

## 144 **2.4. Drug administration**

145 Once the animals were familiarized with the free viewing protocol and accustomed to  
146 intramuscular injections (using positive reinforcement training (Coleman et al., 2008)),  
147 atomoxetine (ATX, Tocris Bioscience, Ellisville, MO) and saline (control) administration  
148 sessions began. ATX is a potent NE reuptake inhibitor, as shown in previous studies (Bymaster et  
149 al., 2002; Koda et al., 2010). We chose the smallest efficient doses reported in our and others'  
150 previous studies conducted in monkeys (Gamo et al., 2010; Carole Guedj et al., 2017b; Guedj et  
151 al., 2019; Reynaud et al., 2019). Each experiment started with one week of saline administration,  
152 followed by 2 or 4 weeks of testing with increasing doses of ATX (one dose per week): 0.5mg/kg  
153 and 1mg/kg (GE and CE) or 0.1mg/kg, 0.5mg/kg, 1mg/kg and 1.5mg/kg (CA and GU. ATX or  
154 saline was administered intramuscularly 30 min prior to testing. In total, for each animal, we  
155 collected 3 to 5 sessions with each dose of ATX and 3 to 5 sessions of saline condition.

156

## 157 **2.5. Data analysis**

158 The data were analyzed separately for each monkey. Eye movements were visually  
159 inspected with a customized toolbox implemented in MATLAB. Eye movements were recorded  
160 during the fixation and stimulus presentation period. To adjust the eye position with the center of  
161 the stimulus, we subtracted from each sample collected during the image presentation its  
162 baseline, i.e. the mean eye position during the fixation period.

### 163 **2.5.1. Pupil diameter**

164 We computed the averaged normalized pupil diameter in the fixation period (500ms before the  
165 image onset), for each animal and each pharmacological condition. For each trial, the mean pupil

166 diameter across this 500ms window was divided by the root mean square separately for each  
167 animal. These measures were then compared across pharmacological conditions.

168

### 169 *2.5.2. Explorations parameters*

170 First, we calculated the total duration of the exploration as the percentage of time that monkeys  
171 spent exploring the image per trial, i.e. the number of samples recorded inside the stimulus-image  
172 ( $\pm 2^\circ$ ) divided by the total number of samples recorded during image presentation. Then, we  
173 defined fixation events, using EyeMMV toolbox implemented in MATLAB (Krassanakis et al.,  
174 2014), as eye positions lasting at least 70ms within a location of  $1.2^\circ$  of radius. The first fixation  
175 was excluded from the analysis as it was a direct consequence of the preceding central fixation  
176 period. All fixations which fell outside the image were excluded from the analysis ( $\pm 2^\circ$   
177 tolerance). We calculated the fixation number per trial and the duration of each fixation.

178 To assess the effects of ATX on the exploration parameters, we calculated for each trial  
179 within each category of images the difference between the mean fixation duration or number of  
180 fixations in ATX and saline conditions:

$$\Delta\text{Fixation\_Duration} = \frac{\text{Fixation\_Duration}_{\text{ATX}} - \text{mean Fixation\_Duration}_{\text{Saline}}}{|\text{mean Fixation\_Duration}_{\text{Saline}}|} \times 100$$

$$\Delta\text{Fixation\_Number} = \frac{\text{Fixation\_Number}_{\text{ATX}} - \text{mean Fixation\_Number}_{\text{Saline}}}{|\text{mean Fixation\_Number}_{\text{Saline}}|} \times 100$$

181

182



### 183 **2.5.3. Computation of the saliency-related fixations**

184 We used the Graph-Based Visual Saliency model (GBVS) (Harel et al., 2006) to compute the  
185 saliency map of each image. The objective was to determine the impact of image salience on gaze  
186 orienting, which reflects the contribution of low-level sensory signals to attention control (Itti and  
187 Koch, 2000). This model uses a graph-based approach to obtain a saliency map that is dependent  
188 on global information. First, the feature maps are computed based on three dimensions (color,  
189 intensity and orientation). Then, activation maps are computed as a directional graph with edge  
190 weights depending on the dissimilarity or closeness of neighborhood nodes. Moreover, a distance  
191 penalty function is applied, so that nodes which are distant only weakly interact. These activation  
192 maps were then normalized to concentrate activation into a few key locations, and further  
193 combined into saliency maps (figure 1B). Based on these saliency maps, we calculated the mean  
194 saliency corresponding to each map and the mean saliency at each fixation (*saliency-related*  
195 *fixations*). We observed that the mean saliency was significantly different depending on the  
196 image category ( $\chi^2_{(2)}=641.2$ ,  $p<0.001$ ). Specifically, the saliency was higher for the scrambled  
197 images compared to the intact images (landscape vs. scrambled:  $|t|_{(27)}=16$ ,  $p<0.001$ ; scrambled vs.  
198 monkey face:  $|t|_{(27)}=25$ ,  $p<0.001$ ), and the saliency was higher for the landscape images compared  
199 to the monkey face images ( $|t|_{(27)}=9$ ,  $p<0.001$ ). For the *saliency-related fixations*, we calculated  
200 the mean value of saliency inside a square of  $2^\circ$  around the center of each fixation. The first  
201 fixation and all fixations outside the image were excluded from the analysis ( $\pm 2^\circ$  tolerance).  
202 Then, to assess the effects of ATX on the *saliency-related fixations* accounting for the image  
203 category bias in mean saliency, we normalized the *saliency-related fixations* by computing for  
204 each trial within each category of images the difference between the mean *saliency-related*  
205 *fixations* in ATX and saline conditions:

$$\Delta\text{saliency} = \frac{\text{saliency-related fixations}_{\text{ATX}} - \text{mean saliency-related fixations}_{\text{Saline}}}{|\text{mean saliency-related fixations}_{\text{Saline}}|} \times 100$$

## 206 2.6. Statistical analysis

207 We used linear mixed models (using the ‘lme4’ package for R, (Bates et al., 2014)) to examine  
208 the effect of ATX on the different dependent measures described above, for each monkey. As a  
209 first step, we defined a model containing the most appropriate random effects (i.e. grouping  
210 factors and hierarchical structure of the data). Random effects were thus introduced sequentially,  
211 and their effect on model fit was assessed through Likelihood Ratio Tests (LRT): residuals of  
212 each model were compared, and the one with significantly lower deviance as assessed by a chi-  
213 squared test was chosen (Supplementary Table S1). We then tested the effect of the  
214 pharmacological condition and image category as fixed factors to evaluate the effect of ATX on  
215 the *exploration duration*, *fixation number* and *fixation duration*. Finally, post-hoc comparisons  
216 were carried out using pairwise comparisons through the ‘lsmeans’ package for R (Lenth, 2016),  
217 (p-adjusted with false discovery rate method (Benjamini and Hochberg, 1995)) to assess the  
218 effect of the different doses of ATX and the different categories of images.

219 Then, we used one-sample t-tests to determine whether the  $\Delta\text{saliency}$  differed significantly from  
220 0 in the ATX condition, i.e. to determine the influence of the different doses of ATX on *saliency-*  
221 *related fixations* with respect to the saline condition. To test the relationship between the  
222 *saliency-related fixations* in ATX and saline conditions, we used Spearman's correlation tests  
223 including all monkeys to assess the correlation between the mean *saliency-related fixations* in  
224 saline condition and  $\Delta\text{saliency}$ . Finally, we tested the relationship between  $\Delta\text{saliency}$  and  
225  $\Delta\text{Fixation\_duration}$  or  $\Delta\text{Fixation\_number}$  using a Spearman's correlation test including all  
226 monkeys.

227

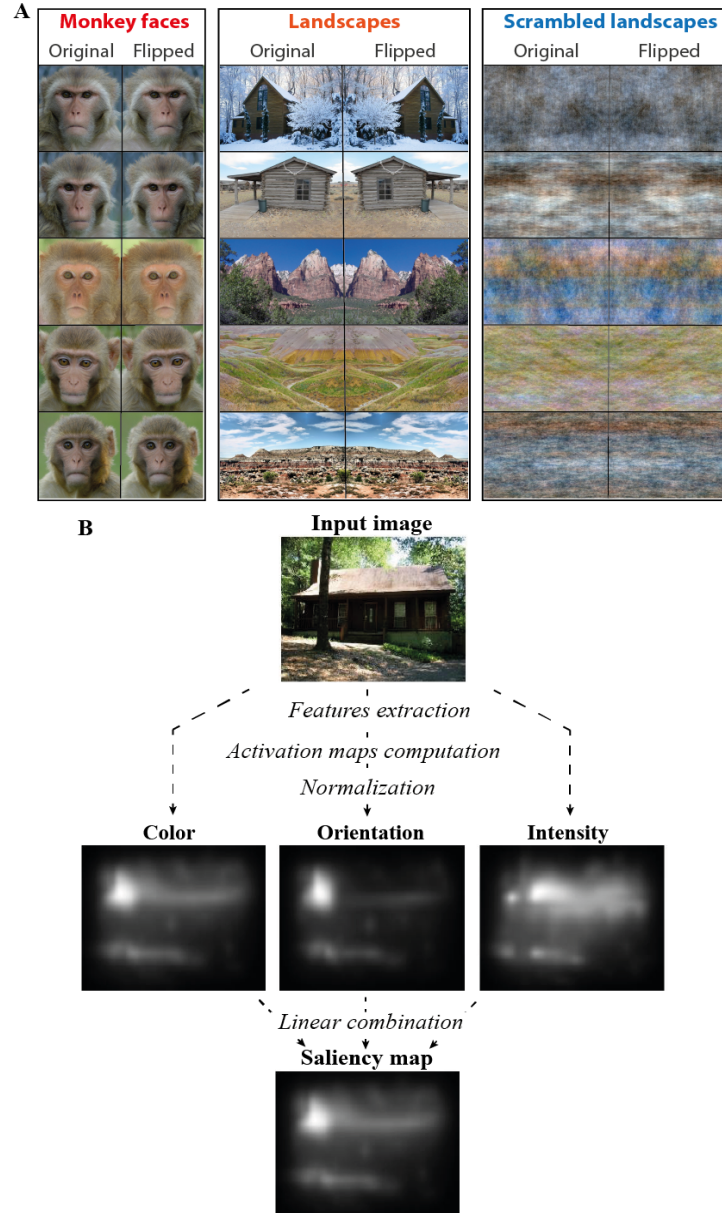

228

229 **Figure 1. Image categories and GBVS model.** A: Example of images presented during one  
230 testing session. Each testing session comprised the presentation of 30 images of 3 different  
231 categories: 10 monkey faces, 10 natural landscape images and 10 scrambled landscape images.  
232 Each category comprised 5 original images and 5 horizontally flipped images. B: To compute the  
233 image saliency map, we used the Graph-Based Visual Saliency model (Harel et al., 2006). This  
234 model computes the activation maps based on several features (color, intensity and orientation),  
235 normalizes them, and finally combines all the maps into one single saliency map.

236

237

## 238 **3. Results**

### 239 **3.1. Effect of ATX on pupil diameter (Figure 2)**

240 To estimate the effect of ATX injection on LC-NE activity, we measured pupil diameter during  
241 the fixation period (500ms before the image onset). We found a significant main effect of  
242 pharmacological condition on pupil diameter in all monkeys ( $\chi^2_{(4)}=697.9$ ,  $p<0.001$  for CA,  
243  $\chi^2_{(4)}=1004.3$ ,  $p<0.001$  for GU,  $\chi^2_{(2)}=89.8$ ,  $p<0.001$  for CE,  $\chi^2_{(2)}=46.1$ ,  $p<0.001$  for GE). All doses  
244 of ATX significantly increased pupil diameter compared to the saline condition (CA:  $|t|_{(608.3)}=4.6$ ,  
245  $p<0.001$  with 0.1mg/kg,  $|t|_{(608.3)}=11.6$ ,  $p<0.001$  with 0.5mg/kg,  $|t|_{(473.1)}=15.4$ ,  $p<0.001$  with  
246 1mg/kg,  $|t|_{(608.3)}=21.6$ ,  $p<0.001$  with 1.5mg/kg; GU:  $|t|_{(711)}=4$ ,  $p<0.001$  with 0.1mg/kg,  $|t|_{(711)}=13$ ,  
247  $p<0.001$  with 0.5mg/kg,  $|t|_{(712.3)}=18.2$ ,  $p<0.001$  with 1mg/kg  $|t|_{(711)}=27.8$ ,  $p<0.001$  with 1.5mg/kg;  
248 CE:  $|t|_{(443)}=2.8$ ,  $p=0.005$  with 0.5mg/kg,  $|t|_{(437.4)}=9.2$ ,  $p<0.001$  with 1mg/kg; GE:  $|t|_{(443)}=4.8$ ,  
249  $p<0.001$  with 0.5mg/kg,  $|t|_{(424.2)}=6.4$ ,  $p<0.001$  with 1mg/kg). Note that the effect size (computed  
250 as the difference between the mean pupil diameter in saline and ATX conditions) induced by  
251 ATX injection on pupil diameter differed between monkeys. Specifically, the increase of pupil  
252 diameter induced by ATX was lower for GE (maximum increase of 0.03 with 1mg/kg of ATX)  
253 compared to the other monkeys (1.0mg/kg of ATX: CA: 0.13 , GU: 0.13 , CE: 0.08).

254

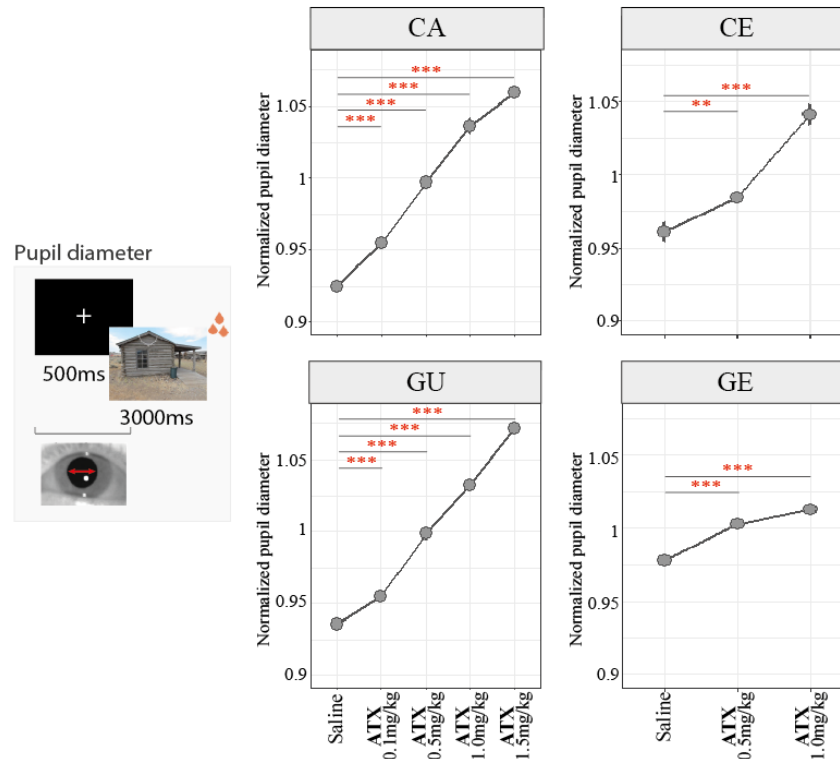

255  
256 **Figure 2. ATX effect on pupil diameter.** For each animal and each pharmacological condition,  
257 we computed the averaged normalized (mean divided by the root mean square) pupil diameter  
258 (mean  $\pm$  s.e.) during the fixation period (500ms before the image onset). ATX significantly  
259 increased pupil diameter as a function of the dose, in all monkeys, during the fixation period.  
260 \*\*:p-value < 0.01; \*\*\*:p-value < 0.001.  
261

### 262 **3.2. Effect of ATX on the exploration parameters**

263 To determine whether ATX injection modulates monkeys' exploration behavior, we tested the  
264 effect of ATX on duration of exploration, duration of fixations and number of fixations. These  
265 results are summarized in Table 1 (see supplementary table S2 for more details). The most  
266 consistent effect of ATX across animals concerned the *fixation duration* (Figure 3). We found a  
267 significant main effect of pharmacological condition on *fixation duration* for 3 out of 4 monkeys  
268 ( $\chi^2_{(4)}=10.7$ ,  $p=0.03$  for CA,  $\chi^2_{(4)}=17.3$ ,  $p=0.001$  for GU and  $\chi^2_{(2)}=21.5$ ,  $p<0.001$  for CE). Note that  
269 for monkey GE, with the lowest increase of pupil diameter after ATX injection, ATX did not

270 impact fixation duration. ATX significantly increased the *fixation duration* in the other 3  
271 monkeys (CA:  $|z|=4.1$ ,  $p<0.001$  with ATX 1mg/kg; GU:  $|z|=9.1$ ,  $p<0.001$  with ATX 0.5mg/kg,  
272  $|z|=5.2$ ,  $p<0.001$  with ATX 1mg/kg,  $|z|=4.5$ ,  $p<0.001$  ATX 1.5mg/kg; CE:  $|t|_{(2690)}=12.1$ ,  $p<0.001$   
273 with ATX 0.5mg/kg). This effect was accompanied by a significant interaction between  
274 pharmacological condition and image category for two monkeys ( $\chi^2_{(8)}=20.9$ ,  $p=0.007$  for GU and  
275  $\chi^2_{(4)}=61.9$ ,  $p<0.001$  for CE). Specifically, for monkey CE, *fixation duration* increased for monkey  
276 faces ( $t_{(2694)}=-8.3$ ,  $p<0.001$ ) and scrambled landscape images ( $|t|_{(2692)}=9.9$ ,  $p<0.001$ ) with ATX  
277 0.5mg/kg whereas it decreased for landscapes ( $|t|_{(2681)}=2.8$ ,  $p=0.008$ ) and scrambled landscape  
278 images ( $|t|_{(2700)}=2.2$ ,  $p=0.02$ ) with ATX 1.0mg/kg. For monkey GU, *fixation duration* overall  
279 increased most consistently with ATX 0.5 mg/kg, in which the effect was detected for all image  
280 categories ( $|z|=7.4$ ,  $p<0.001$  for monkey face,  $|z|=3.4$ ,  $p=0.003$  for landscape and  $|z|=4.6$ ,  $p<0.001$   
281 for scrambled landscape). Other doses were also associated with increased *fixation duration*, but  
282 less consistently across image categories (0.1mg/kg:  $|z|=2.1$ ,  $p=0.04$  for monkey face; 1mg/kg:  
283  $|z|=4.7$ ,  $p<0.001$  for monkey face; 1.5mg/kg:  $|z|=2.4$ ,  $p=0.02$  for monkey face,  $|z|=3.3$ ,  $p=0.003$   
284 for scrambled landscape). In summary, the effect of the different doses of ATX on *fixation*  
285 *duration* varied across animals. For each animal, a given dose of ATX tended to enhance more  
286 effectively the *fixation duration* as compared to the other doses, without any systematic bias for a  
287 given category. For monkeys GU and CE, this effect was found with the ATX dose of 0.5mg/kg.  
288 For monkey CA, this effect was found with a higher dose of ATX, that is 1mg/kg.

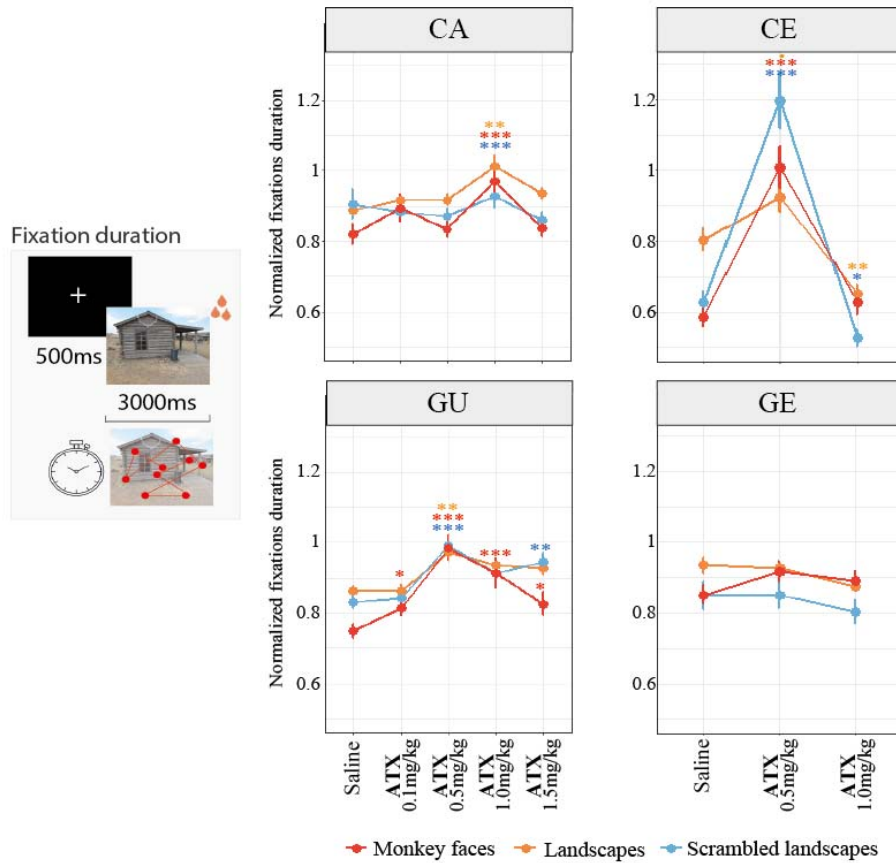

289

290 **Figure 3. ATX effect on fixation duration.** For each animal, each pharmacological condition  
 291 and each image category, we computed the averaged normalized (mean divided by the root mean  
 292 square) fixation duration (mean  $\pm$  s.e.). Our results show that ATX increased the *fixation duration*  
 293 for 3 out of 4 monkeys. \*:p-value<0.05; \*\*:p-value<0.01; \*\*\*:p-value<0.001.

294

295 The other exploration parameters, i.e. *exploration duration* and *fixation number*, were also  
 296 impacted by ATX injections for two monkeys (CE and GE). Depending of the dose of ATX, the  
 297 *exploration duration* was either increased (CE with 0.5mg/kg:  $|t|_{(436)}=2.3$ ,  $p=0.02$  for scrambled  
 298 landscape,  $|t|_{(436)}=2.1$ ,  $p=0.03$  for monkey face; GE with 1mg/kg:  $|t|_{(439.6)}=4.5$ ,  $p<0.001$  for all  
 299 image categories) or decreased (CE with 1mg/kg:  $|t|_{(439.7)}=4.2$ ,  $p<0.001$  for landscape,  $|t|_{(439.7)}=3.4$ ,  
 300  $p=0.001$  for scrambled landscape,  $|t|_{(439.7)}=4$ ,  $p<0.001$  for monkey face; GE with 0.5mg/kg:  
 301  $|t|_{(436)}=2.7$ ,  $p=0.006$  for all image categories) compared to the saline. The *fixation*



302 *number* decreased with 0.5mg/kg of ATX for monkeys CE ( $|t|_{(431)}=2.8$ ,  $p=0.01$  for landscape,  
303  $|t|_{(431)}=6.1$ ,  $p<0.001$  for scrambled landscape and  $|t|_{(431)}=5.4$ ,  $p<0.001$  for monkey face) and GE  
304 ( $|t|_{(433)}=2.2$ ,  $p=0.03$  for all image categories), and with 1mg/kg for monkey face images for  
305 monkey CE ( $|t|_{(433)}=3.3$ ,  $p=0.002$ ). For monkey GE, the *fixation number* increased with 1mg/kg of  
306 ATX ( $|t|_{(437)}=3.9$ ,  $p<0.001$  for all image categories).

307

### 308 **3.3. Effect of ATX on saliency-related fixations**

309 Using the Graph-Based Visual Saliency model (Harel et al., 2006), we obtained the saliency map  
310 for each image, that reflects low-level features of the image in terms of three features (namely  
311 color, intensity and orientation). The saliency map is thus independent from monkeys' behavior,  
312 rather depending on objective physical properties of the images. To investigate the impact of  
313 saliency on attentional orientating during free exploration, we computed the *saliency-related*  
314 *fixations*, corresponding to the mean value of saliency for each location the animals fixated.

315 Our results show that, in the saline condition, the animals' gaze was differently guided by the  
316 saliency of the images, depending on the image category (Figure 4A). Specifically, the *saliency-*  
317 *related fixations* were higher for scrambled landscapes compared to intact landscapes and/or  
318 monkey face images for all monkeys (scrambled vs. intact landscape:  $|t|=3.1$ ,  $p=0.002$  for CA;  
319  $|t|=5.2$ ,  $p<0.001$  for CE;  $|t|=7.3$ ,  $p<0.001$  for GE; scrambled landscape vs. face:  $|t|=7.3$ ,  $p<0.001$   
320 for CA,  $|t|=5.3$ ,  $p<0.001$  for GU;  $|t|=10.1$ ,  $p<0.001$  for CE;  $|t|=8.1$ ,  $p<0.001$  for GE). The effect of  
321 ATX on *saliency-related fixations* was further assessed after normalizing the data ( $\Delta$ *saliency*, see  
322 Methods section) to account for the image category bias (see methods) in mean saliency and  
323 *saliency-related fixations* in the saline condition. A  $\Delta$ *saliency* above zero or below zero  
324 represents respectively, an increase or a decrease of *saliency-related fixations* following ATX



325 injection. For scrambled images, the  $\Delta saliency$  was significantly higher than zero for three  
326 monkeys with at least one dose of ATX (CA:  $|t|_{(49)}=2.3$ ,  $p=0.02$  for 0.1mg/kg; GU:  $|t|_{(49)}=3.5$ ,  
327  $p<0.001$  for 0.1mg/kg; CE:  $|t|_{(47)}=4.9$ ,  $p<0.001$  for 0.5mg/kg,  $|t|_{(48)}=4.6$ ,  $p<0.001$  for 1mg/kg). The  
328 other monkey exhibited a decrease of  $\Delta saliency$  for scrambled images (GE:  $|t|_{(46)}=5.8$ ,  $p<0.001$   
329 for 0.5mg/kg). On the contrary, ATX significantly decreased *saliency-related fixations* for intact  
330 images (landscapes and monkey faces) in two animals with at least one dose of ATX (CA:  
331 landscape:  $|t|_{(49)}=2.9$ ,  $p=0.006$  for 1.5mg/kg; monkey face:  $|t|_{(49)}=2.5$ ,  $p=0.01$  for 0.5mg/kg,  
332  $|t|_{(28)}=3.7$ ,  $p<0.001$  for 1mg/kg,  $|t|_{(49)}=7.1$ ,  $p<0.001$  for 1.5mg/kg; GU: landscape:  $|t|_{(39)}=2.3$ ,  
333  $p=0.02$  for 1mg/kg; monkey face:  $|t|_{(49)}=4.7$ ,  $p<0.001$  for 0.5mg/kg,  $|t|_{(39)}=2.9$ ,  $p=0.005$  for  
334 1mg/kg,  $|t|_{(49)}=5.8$ ,  $p<0.001$  for 1.5mg/kg). The two other monkeys exhibited no effect of ATX  
335 for landscape images and an increase of *saliency-related fixations* for monkey face images (CE:  
336  $|t|_{(49)}=3.1$ ,  $p=0.003$  for 0.5mg/kg; GE:  $|t|_{(49)}=2$ ,  $p=0.048$  for 0.5mg/kg). In summary, these results  
337 show that ATX modulated the animals' exploration pattern based on the images category even  
338 after accounting for the difference of mean saliency between the three image-categories  
339 ( $\Delta saliency$ ) (Supplementary Table S3).

340 To further characterize the effect of ATX, we examined the relationship between the  
341 *saliency-related fixations* in the saline condition and the  $\Delta saliency$  for all doses of ATX. As  
342 illustrated in figure 4B, the difference in *saliency-related fixations* between ATX and saline  
343 conditions ( $\Delta saliency$ ) positively correlated with the mean *saliency-related fixations* in the saline  
344 condition ( $p=0.006$ ,  $r=0.45$ ). This result indicates that under ATX, the animals' fixation pattern  
345 follows the same trend as that observed in the saline condition, with a stronger difference  
346 between images categories. ATX strengthened the exploratory pattern difference between image  
347 categories observed in the saline condition. In other words, ATX strengthen the contribution of

348 saliency-driven gaze orienting when exploration in the control condition entails a high degree of  
349 saliency-driven orienting (scrambled landscape images) while ATX reduced the involvement of  
350 saliency-driven gaze orienting when exploration in the control condition entails a lower degree of  
351 saliency-driven gaze orienting (intact monkey face and landscape images).

352 Finally, to assess the link between the effect of ATX on exploration parameters and  
353 saliency-driven orienting, we examined the relationship between the  $\Delta saliency$  and the  
354  $\Delta fixation\_number$  or  $\Delta fixation\_duration$  for all doses of ATX. We found that the  $\Delta saliency$  was  
355 positively correlated with the  $\Delta fixation\_number$  ( $p=0.02$ ,  $r=0.32$ ), i.e. the effect of ATX on the  
356 number of fixations. This relationship was present for all ATX doses and the slope of all these  
357 correlations tended to increase with the dose of ATX (but not with ATX 0.5 mg/kg where the  
358 pattern was reversed) (figure 4C). On the contrary, the  $\Delta saliency$  was negatively correlated with  
359 the  $\Delta fixation\_duration$ , i.e. the effect of ATX on the duration of fixations, only for the highest  
360 common dose, i.e. 1.0mg/kg of ATX ( $p=0.014$ ,  $r=-0.69$ ) (figure 4D). In other words, under ATX,  
361 a larger number of fixations was associated with more *saliency-related fixations*, while longer  
362 fixations were associated with less *saliency-related fixations*.

363 To sum up, ATX modulated the contribution of saliency-driven gaze orienting, quantified as the  
364 image-saliency at each fixation (i.e. *saliency-related fixations*) depending on the image-category.  
365 Moreover, we found that the influence of ATX on saliency-driven gaze orienting correlated with  
366 the number and duration of fixations. Under ATX, depending on the image category, the animals  
367 either made more fixations of shorter duration to salient locations (in scrambled images), or less  
368 fixations with longer duration to salient locations (in intact monkey face and landscape images).  
369 Together, these results suggest that ATX modulated the contribution of low-level salience on  
370 attentional orienting as a function of the image category.

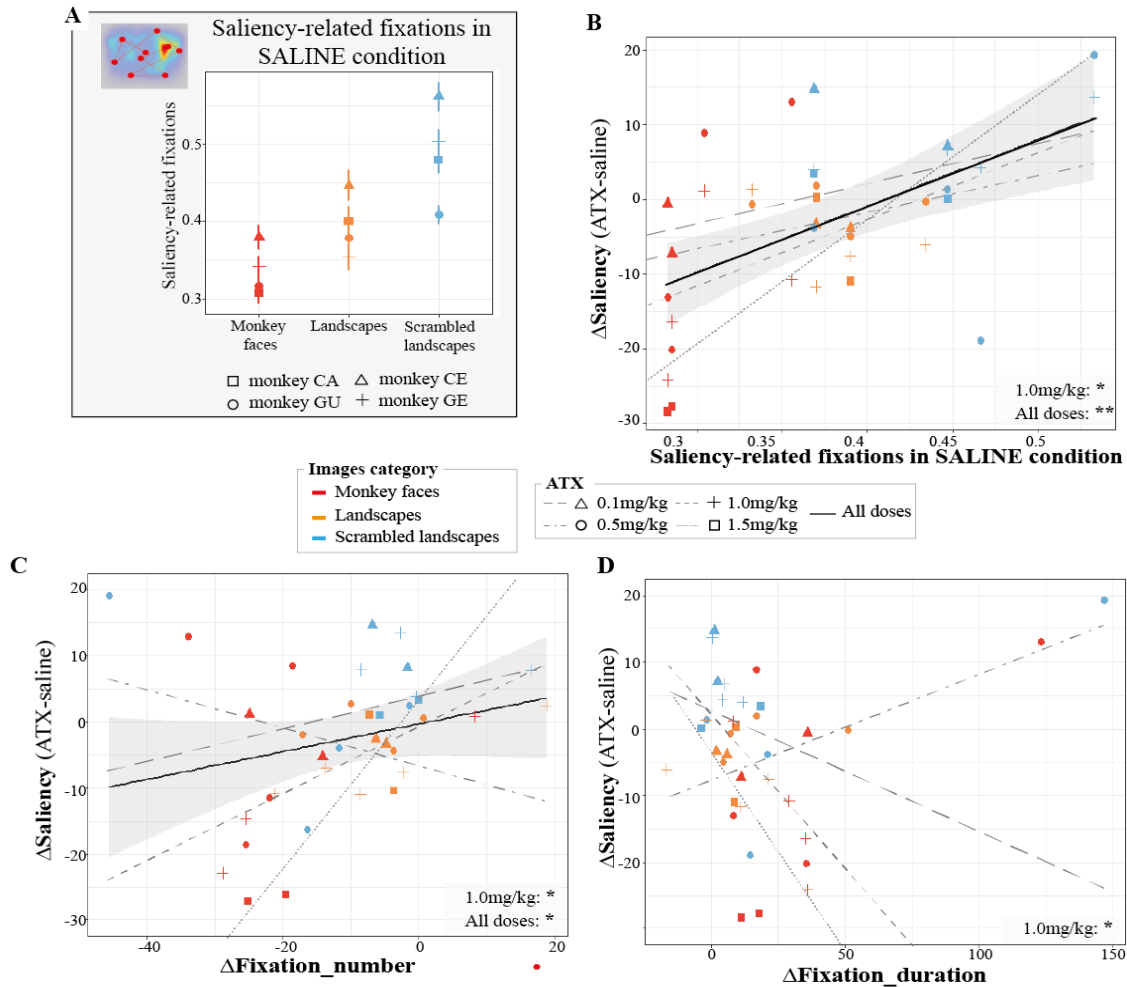

371  
 372 **Figure 4. The effect of ATX on saliency-related fixations.** **A:** For each monkey and each image  
 373 category, we computed the *saliency-related fixations* in the saline condition. Our results show  
 374 that the *saliency-related fixations* were higher for scrambled landscape compared to landscape  
 375 and/or monkey face images for all monkeys. **B:** For each animal, each pharmacological and each  
 376 image category, we computed the  $\Delta$ saliency as the difference between the *saliency-related*  
 377 *fixations* in ATX and saline conditions. Our results show that ATX-induced changes in the  
 378 *saliency-related fixations* was correlated with the *saliency-related fixations* in the saline  
 379 condition with ATX 1.0mg/kg or combining all doses together (grey area, 95% CI combining all doses). **C:**  
 380 For each animal, each pharmacological condition and each image category, we computed the  
 381  $\Delta$ number, as the difference between the fixations number in ATX and saline conditions. Our  
 382 results show that ATX-induced changes in the *saliency-related fixations* was correlated with  
 383 changes in the number of fixations with ATX 1.0mg/kg or combining all doses together (grey  
 384 area, 95% CI combining all doses). **D:** For each animal, each pharmacological condition and each  
 385 image category, we computed the  $\Delta$ duration, as the difference between the fixation duration in  
 386 ATX and saline conditions. Our results show that ATX-induced changes in the *saliency-related*  
 387 *fixations* was correlated with changes in the duration of fixations with ATX 1.0mg/kg. \*:p-  
 388 value<0.05; \*\*:p-value<0.01.

## 389 **4. Discussion**

390 We tested the impact of ATX, a NE reuptake inhibitor that increases NE availability in the brain,  
391 on attentional orienting during image exploration in four monkeys. First, we found that ATX  
392 impacted the way monkeys explored the images. The monkeys consistently spent more time on  
393 each fixation under ATX as compared to the control condition. Second, we found that ATX  
394 modulated the contribution of low-level signaling on spatial orienting, measured as the saliency-  
395 related fixations. Specifically, when exploration in the saline condition implies a high degree of  
396 saliency-driven orienting, i.e. for scrambled landscape images, ATX strengthen the saliency-  
397 driven orienting, while when exploration in the saline condition implies a low level of saliency-  
398 driven orienting, i.e. for monkey face and landscape images, ATX reduced the involvement of  
399 saliency-driven orienting. Moreover, this effect of ATX on saliency-driven orienting correlated  
400 with the effect of ATX on the number and duration of fixations. Our results suggest that NE  
401 adjusts the type of attentional orienting to the environment to explore.

402

### 403 ***4.1. Boosting NE transmission increases fixation duration regardless of the images content.***

404 We assessed the impact of ATX on the exploration pattern by measuring the total duration of  
405 exploration as well as the number and duration of fixations. We found that ATX consistently  
406 increases the fixation duration during the exploration of the different image categories (for 3 out  
407 of 4 monkeys). This effect varied as a function of the ATX dose and across individuals. This  
408 ATX dose-dependent effect was also found in the pupil diameter, with inter-individual  
409 variability. In summary, ATX increased pupil size for the three monkeys that showed an increase  
410 of duration of fixations while the pupil size was only slightly increased for the monkey that

411 showed no effect of ATX injection on duration of fixations. While, we did not find any  
412 significant correlation between pupil size changes and fixation duration, the inter-individual  
413 variability induced by ATX might be related to differences in genetic determinants, in particular  
414 in a NE transporter gene (Greene et al., 2009; Hart et al., 2012; Kim et al., 2006; Whelan et al.,  
415 2012), and differences in neuronal and synaptic properties in response to neuromodulators  
416 (Hamood and Marder, 2014). Many studies showed that the duration of fixations varies with the  
417 image content (Rayner, 2009, 1998). For example, it has been shown that the duration of fixation  
418 was longer for atypical objects (Henderson et al., 1999) or when the scene luminance was  
419 decreased (Henderson et al., 2012; Loftus, 1985; Walshe and Nuthmann, 2014). When reading  
420 words, the fixation duration can be affected by different properties of words, such as their  
421 frequency, their predictability or their length (Kliegl et al., 2006; Reichle et al., 1998). The  
422 fixation duration reflects both visual and cognitive processing. Two possible interpretations can  
423 explain the increase of fixation duration after ATX injection. It can either reflect a slowdown of  
424 information processing, thus leading to longer fixations to process visual information, or it can  
425 reflect a deeper processing of visual information. On the basis of the facilitating effect of NE on  
426 sensory signal processing through an improvement of the signal-noise ratio in sensory cortex (C  
427 Guedj et al., 2017; Linster, 2019; Linster and Escanilla, 2019; Navarra and Waterhouse, 2019;  
428 Waterhouse and Navarra, 2019), we deem the first interpretation as unlikely. This role of the LC-  
429 NE system has been documented for the different sensory systems, visual (Navarra et al., 2013),  
430 auditory (Martins and Froemke, 2015), olfactory (Linster, 2019) and somatosensory system  
431 (Devilbiss and Waterhouse, 2004). Instead, the interpretation in terms of a deeper processing is  
432 more plausible. This increase in the duration of fixation was observed for all image categories  
433 tested, i.e. intact and scrambled landscapes and monkey faces, which leads us assuming an  
434 overall deeper processing of visual information regardless of the orienting process engaged

435 during exploration. In other words, our results suggested that, in a free exploration context  
436 without any task requirement, ATX promotes a slower but more detailed visual processing of the  
437 environment (Glaholt and Reingold, 2012; Velichkovsky et al., 2000).

438

#### 439 **4.2. Boosting NE transmission adjusts the attentional orienting to the image content.**

440 During free exploration, overt attentional orienting inferred from gaze position can either be  
441 driven by low-level physical characteristics of the image or by higher-order signals such as the  
442 subjects' preferences or interests, etc. To assess the degree of attentional capture induced by  
443 physical characteristics of the image, we computed the saliency map for each image based on  
444 their low-level features, i.e. color, intensity and orientation (Harel et al., 2006). Note that the  
445 animals viewed different intact and scrambled landscapes images every day, yet the same  
446 monkey face images were presented every day across all sessions. It is thus possible that  
447 familiarity with these latter images could differently impact the effect of ATX on gaze position.  
448 Despite this limitation, and as expected, in the saline condition we found that the animals' gaze  
449 orientating was influenced by the level of saliency in the image [e.g. 50–52]. In the scrambled  
450 landscapes, with a higher mean saliency, the locations that the monkeys fixated were more salient  
451 compared to the intact images (landscape and monkey faces). We found that ATX strengthened  
452 this pattern. Specifically, for scrambled images, ATX increased the *saliency-related fixations* (for  
453 three monkeys) whereas for intact images (landscape and monkey faces), ATX decreased the  
454 *saliency-related fixations* (for two monkeys). In addition, a positive correlation was found  
455 between the effect of ATX on *saliency-related fixations* ( $\Delta$ saliency) and the influence of saliency  
456 on gaze orienting in control condition (*saliency-related fixations* in the saline condition), which  
457 depends on the image category. In other word, ATX modulated the contribution of both types of

458 orienting processes, i.e. saliency-driven and top-down-driven orienting, during image  
459 exploration. As discussed below, this finding fits with an increasing number of studies  
460 demonstrating the impact of NE onto sensory and high-level processes to shape behavior.

461         On the one hand, accumulating evidence has documented NE influences on sensory  
462 (bottom-up) processes, even at very early stages of sensory signal processing, improving the  
463 signal-noise ratio in sensory cortex in response to incoming stimuli of the environment (Navarra  
464 and Waterhouse, 2019; Waterhouse and Navarra, 2019). Recent studies showed that manipulating  
465 the NE level in humans modulates their perceptual sensitivity to detect a visual target (Gelbard-  
466 Sagiv et al., 2018; Guedj et al., 2019), and this effect reflected changes in evoked potentials and  
467 fMRI signals in the visual cortex (Gelbard-Sagiv et al., 2018). Another recent study showed that  
468 boosting the NE transmission in monkeys speeded up the target detection through a faster  
469 accumulation rate of sensory information (Reynaud et al., 2019). At rest, ATX was also found to  
470 reduce the functional correlation strength within sensory networks and to modify the functional  
471 connectivity between the LC and the fronto-parietal attention network (C Guedj et al., 2017;  
472 Carole Guedj et al., 2017a), involved in visuo-spatial orienting (Corbetta et al., 2008).

473         On the other hand, the LC-NE system is proposed to promote behavioral flexibility in  
474 order to adapt and optimize behavior depending on the contingencies of the environment (Aston-  
475 Jones et al., 1999; Aston-Jones and Cohen, 2005; Bouret and Sara, 2005), thus suggesting an  
476 impact of LC-NE system in high-level (top-down) processes. For example, the LC-NE system  
477 improves the ability to adapt behavior after a change in the rule in a set-shifting task in rats (Cain  
478 et al., 2011; McGaughy et al., 2008; Newman et al., 2008). A recent study also highlighted a  
479 context-dependent effect of the NE system, inferred from the pupil diameter, often considered as  
480 a proxy of the LC-NE activity: the authors reported larger diameter of the pupil in highly

481 predictive contexts as compared to non-predictive contexts (Dragone et al., 2018). These context-  
482 dependent effects could result from the action of LC-NE system on prefrontal cortex that guides  
483 top-down driven behavior (Berridge and Spencer, 2016; Robbins and Arnsten, 2009).

484 Our results further reveal correlations between the effect of ATX on the *saliency-related*  
485 *fixations* and the effect of ATX on two exploration parameters, i.e. number and duration of  
486 fixations. Specifically, when ATX increased the *saliency-related fixations*, especially for  
487 scrambled images, it correlated with an increased number of fixations, and tended to increase  
488 fixation duration. By contrast, when ATX decreased the *saliency-related fixations*, especially for  
489 intact images, it correlated with a reduced number of fixations and longer fixation durations. This  
490 result suggests that ATX adjusts the attentional orienting to the image content. ATX strengthened  
491 the difference between the two types of attentional orienting observed in the saline condition: an  
492 automatic saliency-driven attention orienting, based on the physical properties of the images, and  
493 a more voluntary top-down- driven orienting, based on the subjects' preferences and interests.  
494 These ATX-induced changes in attentional orienting could reflect a modulation of priority maps,  
495 a neural representation combining information of low-level saliency and top-down control. The  
496 LC-NE system could potentially act on the different brain areas involved in the computation of  
497 these priority maps (Bisley and Goldberg, 2010; Bisley and Mirpour, 2019; Fecteau and Munoz,  
498 2006; Marsman et al., 2016; Mazer and Gallant, 2003; Mo et al., 2018) to bias information  
499 prioritization depending on the environment and adjust attentional orienting. As such, the LC-NE  
500 system would be in an ideal position to fine-tune behavior in order to appropriately and optimally  
501 respond to the environment and promote behavioral flexibility (Aston-Jones and Cohen, 2005;  
502 Navarra and Waterhouse, 2019).



503           In conclusion, our results reveal that, in naturalistic conditions, inhibiting the reuptake of  
504 norepinephrine with ATX injection adjusts the contribution of low-level salience on attentional  
505 orienting depending on the high-level image content. These results suggest that norepinephrine  
506 play a role in weighing the contribution of stimulus-driven and top-down control on attentional  
507 orienting.

508

## 509 **Funding and Disclosure**

510 This work was funded by the French National Research Agency (ANR) ANR-14-CE13-0005-1  
511 grant. It was also supported by the NEURODIS Foundation. It was performed within the  
512 framework of the LABEX CORTEX (ANR-11-LABX-0042) of Lyon University within the  
513 program “Investissements d’Avenir” (ANR-11-IDEX-0007) operated by the ANR. EB received  
514 funding from the European Union's Horizon 2020 research and innovation programme (Marie  
515 Curie Actions) under grant agreement MSCA-IF-2016-746154. EM is supported by a chair  
516 INSERM-UCBL1. The authors declare no competing financial interests.

517

## 518 **Acknowledgements**

519 We thank Gislène Gardechaux and Frédéric Volland for technical and engineering assistance.

520

## 521 **Author Contributions**

522 FHB conceived the work; FHB and AJR designed the work; AJR performed experiments and  
523 analyzed the data; EK, EB and EM provided support in data analysis; AJR and FHB interpreted

524 the data and drafted the work; All authors revised and approved the final version of the  
525 manuscript.

526

## 527 **References**

528 Arnsten, A.F.T., Wang, M.J., Paspalas, C.D., 2012. Neuromodulation of thought: flexibilities and  
529 vulnerabilities in prefrontal cortical network synapses. *Neuron* 76, 223–39.

530 <https://doi.org/10.1016/j.neuron.2012.08.038>

531 Aston-Jones, G., Cohen, J.D., 2005. An integrative theory of locus coeruleus-norepinephrine  
532 function: adaptive gain and optimal performance. *Annu. Rev. Neurosci.* 28, 403–450.

533 <https://doi.org/10.1146/annurev.neuro.28.061604.135709>

534 Aston-Jones, G., Rajkowski, J., Cohen, J., 1999. Role of locus coeruleus in attention and  
535 behavioral flexibility. *Biol. Psychiatry* 46, 1309–1320. <https://doi.org/10.1016/S0006->

536 [3223\(99\)00140-7](https://doi.org/10.1016/S0006-3223(99)00140-7)

537 Bates, D., Mächler, M., Bolker, B.M., Walker, S.C., 2014. Fitting linear mixed-effects models  
538 using lme4. arXiv:1406.5823v1.

539 Benjamini, Y., Hochberg, Y., 1995. Controlling the False Discovery Rate: A Practical and  
540 Powerful Approach to Multiple Testing. *J. R. Stat. Soc. Ser. B.*

541 <https://doi.org/10.2307/2346101>

542 Berg, D.J., Boehnke, S.E., Marino, R.A., Munoz, D.P., Itti, L., 2009. Free viewing of dynamic  
543 stimuli by humans and monkeys 9, 1–15. <https://doi.org/10.1167/9.5.19.Introduction>

544 Berger, D., Paziienti, A., Flores, F.J., Nawrot, M.P., Maldonado, P.E., Gr??n, S., 2012. Viewing  
545 strategy of Cebus monkeys during free exploration of natural images. *Brain Res.* 1434, 34–

546 46. <https://doi.org/10.1016/j.brainres.2011.10.013>

- 547 Berridge, C.W., Spencer, R.C., 2016. Differential cognitive actions of norepinephrine  $\alpha_2$  and  $\alpha_1$   
548 receptor signaling in the prefrontal cortex. *Brain Res.* 1641, 189–196.  
549 <https://doi.org/10.1016/j.brainres.2015.11.024>
- 550 Bisley, J.W., Goldberg, M.E., 2010. Attention, intention, and priority in the parietal lobe. *Annu.*  
551 *Rev. Neurosci.* 33, 1–21. <https://doi.org/10.1146/annurev-neuro-060909-152823>
- 552 Bisley, J.W., Mirpour, K., 2019. The neural instantiation of a priority map. *Curr. Opin. Psychol.*  
553 29, 108–112. <https://doi.org/10.1016/J.COPSYC.2019.01.002>
- 554 Bouret, S., Sara, S.J., 2005. Network reset: a simplified overarching theory of locus coeruleus  
555 noradrenaline function. *Trends Neurosci.* 28, 574–582.  
556 <https://doi.org/10.1016/j.tins.2005.09.002>
- 557 Bruce, N., Tsotsos, J., 2006. Saliency based on information maximization. *Adv. Neural Inf.*  
558 *Process. Syst.* 18 18, 155–162.
- 559 Buschman, T.J., Miller, E.K., 2007. Top-down versus bottom-up control of attention in the  
560 prefrontal and posterior parietal cortices. *Science* 315, 1860–1862.  
561 <https://doi.org/10.1126/science.1138071>
- 562 Bymaster, F.P., Katner, J.S., Nelson, D.L., Hemrick-Luecke, S.K., Threlkeld, P.G., Heiligenstein,  
563 J.H., Morin, S.M., Gehlert, D.R., Perry, K.W., 2002. Atomoxetine Increases Extracellular  
564 Levels of Norepinephrine and Dopamine in Prefrontal Cortex of Rat: A Potential  
565 Mechanism for Efficacy in Attention Deficit/Hyperactivity Disorder.  
566 *Neuropsychopharmacology* 27, 699–711. [https://doi.org/10.1016/S0893-133X\(02\)00346-9](https://doi.org/10.1016/S0893-133X(02)00346-9)
- 567 Cain, R.E., Wasserman, M.C., Waterhouse, B.D., McGaughy, J.A., 2011. Atomoxetine facilitates  
568 attentional set shifting in adolescent rats. *Dev. Cogn. Neurosci.* 1, 552–9.  
569 <https://doi.org/10.1016/j.dcn.2011.04.003>
- 570 Clark, C.R., Geffen, G.M., Geffen, L.B., 1989. Catecholamines and the covert orientation of

571 attention in humans. *Neuropsychologia* 27, 131–139. <https://doi.org/10.1016/0028->  
572 3932(89)90166-8

573 Coleman, K., Pranger, L., Maier, A., Lambeth, S.P., Perlman, J.E., Thiele, E., Schapiro, S.J.,  
574 2008. Training rhesus macaques for venipuncture using positive reinforcement techniques: a  
575 comparison with chimpanzees. *J. Am. Assoc. Lab. Anim. Sci.* 47, 37–41.

576 Corbetta, M., Patel, G., Shulman, G.L., 2008. The Reorienting System of the Human Brain: From  
577 Environment to Theory of Mind. *Neuron* 58, 306–324.  
578 <https://doi.org/10.1016/j.neuron.2008.04.017>

579 Corbetta, M., Shulman, G.L., 2002. Control of goal-directed and stimulus-driven attention in the  
580 brain. *Nat. Rev. Neurosci.* 3, 201–215. <https://doi.org/10.1038/nrn755>

581 Coull, J.T., Nobre, A.C., Frith, C.D., 2001. The Noradrenergic  $\alpha_2$  Agonist Clonidine Modulates  
582 Behavioural and Neuroanatomical Correlates of Human Attentional Orienting and Alerting.  
583 *Cereb. Cortex* 11, 73–84. <https://doi.org/10.1093/cercor/11.1.73>

584 Devilbiss, D.M., Waterhouse, B.D., 2004. The Effects of Tonic Locus Ceruleus Output on  
585 Sensory- Evoked Responses of Ventral Posterior Medial Thalamic and Barrel Field Cortical  
586 Neurons in the Awake Rat. *J. Neurosci.* 24, 10773–10785.  
587 <https://doi.org/10.1523/jneurosci.1573-04.2004>

588 Dragone, A., Lasaponara, S., Pinto, M., Rotondaro, F., Luca, M. De, Doricchi, F., 2018.  
589 Expectancy modulates pupil size during endogenous orienting of spatial attention. *CORTEX*  
590 102, 57–66. <https://doi.org/10.1016/j.cortex.2017.09.011>

591 Fecteau, J.H., Munoz, D.P., 2006. Saliency, relevance, and firing rate: a priority map for target  
592 selection. *J. Neurosci.* 26, 10773–10785. <https://doi.org/10.1016/j.tics.2006.06.011>

593 Gamo, N.J., Wang, M., Arnsten, A.F.T., 2010. Methylphenidate and Atomoxetine Enhance  
594 Prefrontal Function Through  $\alpha_2$ -Adrenergic and Dopamine D1 Receptors. *J. Am. Acad.*

- 595 Child Adolesc. Psychiatry 49, 1011–1023. <https://doi.org/10.1016/j.jaac.2010.06.015>
- 596 Gelbard-Sagiv, H., Magidov, E., Sharon, H., Hendler, T., Nir, Y., 2018. Noradrenaline Modulates  
597 Visual Perception and Late Visually Evoked Activity. *Curr. Biol.* 28, 1–11.  
598 <https://doi.org/10.1016/j.cub.2018.05.051>
- 599 Glaholt, M.G., Reingold, E.M., 2012. Direct control of fixation times in scene viewing: Evidence  
600 from analysis of the distribution of first fixation duration. *Vis. cogn.* 20, 605–626.  
601 <https://doi.org/10.1080/13506285.2012.666295>
- 602 Greene, C.M., Bellgrove, M.A., Gill, M., Robertson, I.H., 2009. Noradrenergic genotype predicts  
603 lapses in sustained attention. *Neuropsychologia* 47, 591–594.  
604 <https://doi.org/10.1016/j.neuropsychologia.2008.10.003>
- 605 Guedj, Carole, Meunier, D., Meunier, M., Hadj-Bouziane, F., 2017a. Could LC-NE-Dependent  
606 Adjustment of Neural Gain Drive Functional Brain Network Reorganization? *Neural Plast.*  
607 2017, 1–12. <https://doi.org/10.1155/2017/4328015>
- 608 Guedj, Carole, Monfardini, E., Reynaud, A.J., Farnè, A., Meunier, M., Hadj-bouziane, F., 2017b.  
609 Boosting Norepinephrine Transmission Triggers Flexible Reconfiguration of Brain  
610 Networks at Rest 4691–4700. <https://doi.org/10.1093/cercor/bhw262>
- 611 Guedj, C, Monfardini, E., Reynaud, A.J., Farnè, A., Meunier, M., Hadj-Bouziane, F., 2017.  
612 Boosting Norepinephrine Transmission Triggers Flexible Reconfiguration of Brain  
613 Networks at Rest. *Cereb. Cortex* 27, 4691–4700. <https://doi.org/10.1093/cercor/bhw262>
- 614 Guedj, C., Reynaud, A., Monfardini, E., Salemme, R., Farnè, A., Meunier, M., Hadj-Bouziane,  
615 F., 2019. Atomoxetine modulates the relationship between perceptual abilities and response  
616 bias. *Psychopharmacology (Berl)*. [https://doi.org/https://doi.org/10.1007/s00213-019-05336-](https://doi.org/https://doi.org/10.1007/s00213-019-05336-7)  
617 [7](https://doi.org/https://doi.org/10.1007/s00213-019-05336-7)
- 618 Hadj-Bouziane, F., Monfardini, E., Guedj, C., Gardechaux, G., Hynaux, C., Farnè, A., Meunier,

- 619 M., 2014. The helmet head restraint system: A viable solution for resting state fMRI in  
620 awake monkeys. *Neuroimage* 86, 536–543.  
621 <https://doi.org/10.1016/j.neuroimage.2013.09.068>
- 622 Hamood, A.W., Marder, E., 2014. Animal-to-Animal Variability in Neuromodulation and Circuit  
623 Function. *Cold Spring Harb. Symp. Quant. Biol.* 79, 21–8.  
624 <https://doi.org/10.1101/sqb.2014.79.024828>
- 625 Harel, J., Koch, C., Perona, P., 2006. Graph-Based Visual Saliency. *Neural Inf. Process. Syst.* 19,  
626 545:552.
- 627 Hart, A.B., de Wit, H., Palmer, A.A., 2012. Genetic factors modulating the response to stimulant  
628 drugs in humans. *Curr. Top. Behav. Neurosci.* 12, 537–77.  
629 [https://doi.org/10.1007/7854\\_2011\\_187](https://doi.org/10.1007/7854_2011_187)
- 630 Henderson, J.M., 2017. Gaze Control as Prediction. *Trends Cogn. Sci.*  
631 <https://doi.org/10.1016/j.tics.2016.11.003>
- 632 Henderson, J.M., Nuthmann, A., Luke, S.G., 2012. Eye Movement Control During Scene  
633 Viewing: Immediate Effects of Scene Luminance on Fixation Durations.  
634 <https://doi.org/10.1037/a0031224>
- 635 Henderson, J.M., Weeks, P.A., Hollingworth, A., 1999. The effects of semantic consistency on  
636 eye movements during complex scene viewing. *J. Exp. Psychol. Hum. Percept. Perform.* 25,  
637 210–228. <https://doi.org/10.1037/0096-1523.25.1.210>
- 638 Itti, L., Baldi, P., 2005. A principled approach to detecting surprising events in video. *Proc. -*  
639 *2005 IEEE Comput. Soc. Conf. Comput. Vis. Pattern Recognition, CVPR 2005 I*, 631–637.  
640 <https://doi.org/10.1109/CVPR.2005.40>
- 641 Itti, L., Koch, C., 2000. A saliency-based search mechanism for overt and covert shifts of visual  
642 attention. *Vision Res.* 40, 1489–1506.

- 643 Itti, L., Koch, C., Niebur, E., 1998. A Model of Saliency-Based Visual Attention for Rapid Scene  
644 Analysis. *IEEE Trans. Pattern Anal. Mach. Intell.* 20, 1254–1259.  
645 <https://doi.org/10.1109/34.730558>
- 646 Kim, C.-H., Hahn, M.K., Joung, Y., Anderson, S.L., Steele, A.H., Mazei-Robinson, M.S., Gizer,  
647 I., Teicher, M.H., Cohen, B.M., Robertson, D., Waldman, I.D., Blakely, R.D., Kim, K.-S.,  
648 2006. A polymorphism in the norepinephrine transporter gene alters promoter activity and is  
649 associated with attention-deficit hyperactivity disorder. *Proc. Natl. Acad. Sci. U. S. A.* 103,  
650 19164–9. <https://doi.org/10.1073/pnas.0510836103>
- 651 Kliegl, R., Nuthmann, A., Engbert, R., 2006. Tracking the mind during reading: The influence of  
652 past, present, and future words on fixation durations. *J. Exp. Psychol. Gen.* 135, 12–35.  
653 <https://doi.org/10.1037/0096-3445.135.1.12>
- 654 Koda, K., Ago, Y., Cong, Y., Kita, Y., Takuma, K., Matsuda, T., 2010. Effects of acute and  
655 chronic administration of atomoxetine and methylphenidate on extracellular levels of  
656 noradrenaline, dopamine and serotonin in the prefrontal cortex and striatum of mice. *J.*  
657 *Neurochem.* 114, no-no. <https://doi.org/10.1111/j.1471-4159.2010.06750.x>
- 658 Krassanakis, V., Filippakopoulou, V., Nakos, B., 2014. EyeMMV toolbox: An eye movement  
659 post-analysis tool based on a two-step spatial dispersion threshold for fixation identification.  
660 *J. Eye Mov. Res.* 7, 1–10. <https://doi.org/10.16910/jemr.7.1.1>
- 661 Lenth, R. V., 2016. Least-Squares Means: The R Package lsmeans [WWW Document].
- 662 Linster, C., 2019. Cellular and network processes of noradrenergic modulation in the olfactory  
663 system. *Brain Res.* 1709, 28–32. <https://doi.org/10.1016/j.brainres.2018.03.008>
- 664 Linster, C., Escanilla, O., 2019. Noradrenergic effects on olfactory perception and learning. *Brain*  
665 *Res.* 1709, 33–38. <https://doi.org/10.1016/j.brainres.2018.03.021>
- 666 Loftus, G.R., 1985. Picture Perception: Effects of Luminance on Available Information and

- 667 Information-Extraction Rate. Psychological Association, Inc.
- 668 Marsman, J.C., Cornelissen, F.W., Dorr, M., Renken, R.J., 2016. A novel measure to determine  
669 viewing priority and its neural correlates in the human brain. *J. Vis.* 16, 1–18.  
670 <https://doi.org/10.1167/16.6.3>.doi
- 671 Martins, A.R.O., Froemke, R.C., 2015. Coordinated forms of noradrenergic plasticity in the locus  
672 coeruleus and primary auditory cortex. *Nat. Neurosci.* 18, 1483.  
673 <https://doi.org/10.1038/NN.4090>
- 674 Mazer, J.A., Gallant, J.L., 2003. Goal-related activity in V4 during free viewing visual search.  
675 Evidence for a ventral stream visual salience map. *Neuron* 40, 1241–50.  
676 [https://doi.org/10.1016/s0896-6273\(03\)00764-5](https://doi.org/10.1016/s0896-6273(03)00764-5)
- 677 McGaughy, J., Ross, R.S., Eichenbaum, H., 2008. Noradrenergic, but not cholinergic,  
678 deafferentation of prefrontal cortex impairs attentional set-shifting. *Neuroscience* 153, 63–  
679 71. <https://doi.org/10.1016/j.neuroscience.2008.01.064>
- 680 Mo, C., He, D., Fang, F., 2018. Attention Priority Map of Face Images in Human Early Visual  
681 Cortex. *J. Neurosci.* 38, 149–157. <https://doi.org/10.1523/JNEUROSCI.1206-17.2017>
- 682 Navarra, R.L., Clark, B.D., Zitnik, G.A., Waterhouse, B.D., 2013. Methylphenidate and  
683 atomoxetine enhance sensory-evoked neuronal activity in the visual thalamus of male rats.  
684 *Exp. Clin. Psychopharmacol.* 21, 363–374.  
685 <https://doi.org/10.1037/a0033563>.Methylphenidate
- 686 Navarra, R.L., Waterhouse, B.D., 2019. Considering noradrenergically mediated facilitation of  
687 sensory signal processing as a component of psychostimulant-induced performance  
688 enhancement. *Brain Res.* <https://doi.org/10.1016/j.brainres.2018.06.027>
- 689 Newman, L.A., Darling, J., McGaughy, J., 2008. Atomoxetine reverses attentional deficits  
690 produced by noradrenergic deafferentation of medial prefrontal cortex. *Psychopharmacology*



- 691 (Berl). 200, 39–50. <https://doi.org/10.1007/s00213-008-1097-8>
- 692 Oliva, A., Torralba, A., 2007. The role of context in object recognition. *Trends Cogn. Sci.*
- 693 <https://doi.org/10.1016/j.tics.2007.09.009>
- 694 Parkhurst, D., Law, K., Niebur, E., 2002a. Modeling the role of salience in the allocation of overt
- 695 visual attention. *Vision Res.* 42, 107–123. [https://doi.org/10.1016/S0042-6989\(01\)00250-4](https://doi.org/10.1016/S0042-6989(01)00250-4)
- 696 Parkhurst, D., Law, K., Niebur, E., 2002b. Modeling the role of salience in the allocation of overt
- 697 visual attention. *Vision Res.* 42, 107–123. [https://doi.org/10.1016/S0042-6989\(01\)00250-4](https://doi.org/10.1016/S0042-6989(01)00250-4)
- 698 Rayner, K., 2009. Eye movements and attention in reading, scene perception, and visual search,
- 699 *Quarterly Journal of Experimental Psychology.* <https://doi.org/10.1080/17470210902816461>
- 700 Rayner, K., 1998. *Psychological Bulletin Eye Movements in Reading and Information*
- 701 *Processing: 20 Years of Research.* Psychological Association, Inc.
- 702 Reichle, E.D., Pollatsek, A., Fisher, D.L., Rayner, K., 1998. Toward a Model of Eye Movement
- 703 Control in Reading. *Psychol. Rev.* 105, 125–157. [https://doi.org/10.1037/0033-](https://doi.org/10.1037/0033-295X.105.1.125)
- 704 [295X.105.1.125](https://doi.org/10.1037/0033-295X.105.1.125)
- 705 Reynaud, A.J., Froesel, M., Guedj, C., Ben Hadj Hassen, S., Cléry, J., Meunier, M., Ben Hamed,
- 706 S., Hadj-Bouziane, F., 2019. Atomoxetine improves attentional orienting in a predictive
- 707 context. *Neuropharmacology* 150, 59–69.
- 708 <https://doi.org/10.1016/J.NEUROPHARM.2019.03.012>
- 709 Robbins, T.W., Arnsten, A.F.T., 2009. The Neuropsychopharmacology of Fronto-Executive
- 710 Function: Monoaminergic Modulation. *Annu. Rev. Neurosci.* 267–287.
- 711 <https://doi.org/10.1146/annurev.neuro.051508.135535>.The
- 712 Velichkovsky, B.M., Dornhoefer, S.M., Pannasch, S., Unema, P.J.A., 2000. Visual fixations and
- 713 level of attentional processing. *Proc. Eye Track. Res. Appl. Symp.* 2000 79–85.
- 714 <https://doi.org/10.1145/355017.355029>

- 715 Walshe, C.R., Nuthmann, A., 2014. Asymmetrical control of fixation durations in scene viewing.  
716 Vision Res. 100, 38–46. <https://doi.org/10.1016/j.visres.2014.03.012>
- 717 Waterhouse, B.D., Navarra, R.L., 2019. The locus coeruleus-norepinephrine system and sensory  
718 signal processing □: A historical review and current perspectives. Brain Res. 1–15.  
719 <https://doi.org/10.1016/j.brainres.2018.08.032>
- 720 Whelan, R., Conrod, P.J., Poline, J.-B., Lourdasamy, A., Banaschewski, T., Barker, G.J.,  
721 Bellgrove, M.A., Büchel, C., Byrne, M., Cummins, T.D.R., Fauth-Bühler, M., Flor, H.,  
722 Gallinat, J., Heinz, A., Ittermann, B., Mann, K., Martinot, J.-L., Lalor, E.C., Lathrop, M.,  
723 Loth, E., Nees, F., Paus, T., Rietschel, M., Smolka, M.N., Spanagel, R., Stephens, D.N.,  
724 Struve, M., Thyreau, B., Vollstaedt-Klein, S., Robbins, T.W., Schumann, G., Garavan, H.,  
725 2012. Adolescent impulsivity phenotypes characterized by distinct brain networks. Nat.  
726 Neurosci. 15, 920–925. <https://doi.org/10.1038/nm.3092>
- 727 Zhou, B., Lapedriza, A., Khosla, A., Oliva, A., Torralba, A., 2017. Places □: A 10 million Image  
728 Database for Scene Recognition 8828, 1–14. <https://doi.org/10.1109/TPAMI.2017.2723009>
- 729 Zhou, B., Lapedriza, A., Xiao, J., Torralba, A., Oliva, A., 2014. Learning deep features for scene  
730 recognition using places database. Adv. Neural ... 487–495.  
731 <https://doi.org/10.1162/153244303322533223>

732

733

734 **Table 1.**

|    |                     | Total duration |       |       |       | Fixation number |       |       |       | Fixation duration |       |       |       |
|----|---------------------|----------------|-------|-------|-------|-----------------|-------|-------|-------|-------------------|-------|-------|-------|
|    |                     | ATX01          | ATX05 | ATX10 | ATX15 | ATX01           | ATX05 | ATX10 | ATX15 | ATX01             | ATX05 | ATX10 | ATX15 |
| CA | Monkey face         | -              | -     | -     | -     | -               | -     | -     | -     |                   |       |       |       |
|    | Landscape           | -              | -     | -     | -     | -               | -     | -     | -     | -                 | -     | ↗*    | -     |
|    | Scrambled landscape | -              | -     | -     | -     | -               | -     | -     | -     |                   |       |       |       |
| GU | Monkey face         | -              | -     | -     | -     | -               | -     | -     | -     | ↗                 | ↗     | ↗     | ↗     |
|    | Landscape           | -              | -     | -     | -     | -               | -     | -     | -     | -                 | ↗     | -     | ↗     |
|    | Scrambled landscape | -              | -     | -     | -     | -               | -     | -     | -     | -                 | ↗     | -     | -     |
| CE | Monkey face         | NA             | NA    | ↗     | ↘     | NA              | NA    | ↘     | ↘     | NA                | NA    | ↗     | -     |
|    | Landscape           | NA             | NA    | -     | ↘     | NA              | NA    | ↘     | -     | NA                | NA    | -     | ↘     |
|    | Scrambled landscape | NA             | NA    | ↗     | ↘     | NA              | NA    | ↘     | -     | NA                | NA    | ↗     | ↘     |
| GE | Monkey face         | NA             | NA    |       |       | NA              | NA    |       |       | NA                | NA    |       |       |
|    | Landscape           | NA             | NA    | ↘*    | ↗*    | NA              | NA    | ↘*    | ↗*    | NA                | NA    | -     | -     |
|    | Scrambled landscape | NA             | NA    |       |       | NA              | NA    |       |       | NA                | NA    |       |       |

735

736

737 **Legends**

738 **Table 1. Effect of ATX on the exploration parameters.** Results of pairwise comparisons  
 739 between the saline and the doses of ATX with corrections for multiple comparisons (see  
 740 supplementary table S2 for more details). ↗ or ↘: significant increase or decrease, respectively,  
 741 after ATX administration; \*: no significant interaction between pharmacological condition and image  
 742 category; -: no significant main effect of pharmacological condition and no interaction between  
 743 pharmacological condition and image category; NA: not applicable. Overall, ATX modulates all  
 744 exploration parameters and the most consistent effect was found for the fixation duration.

745

746 **Figure 1. Image categories and GBVS model.** **A:** Example of images presented during one  
747 testing session. Each testing session comprised the presentation of 30 images of 3 different  
748 categories: 10 monkey faces, 10 natural landscape images and 10 scrambled landscape images.  
749 Each category comprised 5 original images and 5 horizontally flipped images. **B:** To compute the  
750 image saliency map, we used the Graph-Based Visual Saliency model (GBVS, (Harel et al.,  
751 2006)). This model computes the activation maps based on several features (color, intensity and  
752 orientation), normalizes them, and finally combines all the maps into one single saliency map.

753  
754 **Figure 2. ATX effect on pupil diameter.** For each animal and each pharmacological condition,  
755 we computed the averaged normalized (mean divided by the root mean square) pupil diameter  
756 (mean  $\pm$  s.e.) during the fixation period (500ms before the image onset). ATX significantly  
757 increased pupil diameter as a function of the dose, in all monkeys, during the fixation period.  
758 \*\*:p-value < 0.01; \*\*\*:p-value < 0.001

759  
760 **Figure 3. ATX effect on fixation duration.** For each animal, each pharmacological condition  
761 and each image category, we computed the averaged normalized (mean divided by the root mean  
762 square) *fixation duration* (mean  $\pm$  s.e.). Our results show that ATX increased the *fixation*  
763 *duration* for 3 out of 4 monkeys. \*:p-value<0.05; \*\*:p-value<0.01; \*\*\*:p-value<0.001.

764  
765 **Figure 4. The effect of ATX on saliency-related fixations.** **A:** For each monkey and each image  
766 category, we computed the *saliency-related fixations* in the saline condition. Our results show  
767 that the *saliency-related fixations* were higher for scrambled landscape compared to landscape

768 and/or monkey face images for all monkeys. **B:** For each animal, each pharmacological and each  
769 image category, we computed the  $\Delta$ saliency as the difference between the *saliency-related*  
770 *fixations* in ATX and saline conditions. Our results show that ATX-induced changes in the  
771 *saliency-related fixations* was correlated with the *saliency-related fixations* in the saline condition  
772 with ATX 1.0mg/kg or combining all doses together (grey area, 95% CI combining all doses). **C:**  
773 For each animal, each pharmacological condition and each image category, we computed the  
774  $\Delta$ number, as the difference between the fixations number in ATX and saline conditions. Our  
775 results show that ATX-induced changes in the *saliency-related fixations* was correlated with  
776 changes in the number of fixations with ATX 1.0mg/kg or combining all doses together (grey  
777 area, 95% CI combining all doses). **D:** For each animal, each pharmacological condition and each  
778 image category, we computed the  $\Delta$ duration, as the difference between the *fixation duration* in  
779 ATX and saline conditions. Our results show that ATX-induced changes in the *saliency-related*  
780 *fixations* was correlated with changes in the duration of fixations with ATX 1.0mg/kg. \*:p-  
781 value<0.05; \*\*:p-value<0.01.

782
